# Supplementary material for: Extensive remodeling of sugar metabolism through gene loss and horizontal gene transfer in a eukaryotic lineage
Source: PubMed Central journal article supplement (PMC11140947; doi:10.1186/s12915-024-01929-7), 2024-05-30
Supplement: 12915_2024_1929_MOESM2_ESM.pdf [file 12915_2024_1929_MOESM2_ESM.pdf]

**A**

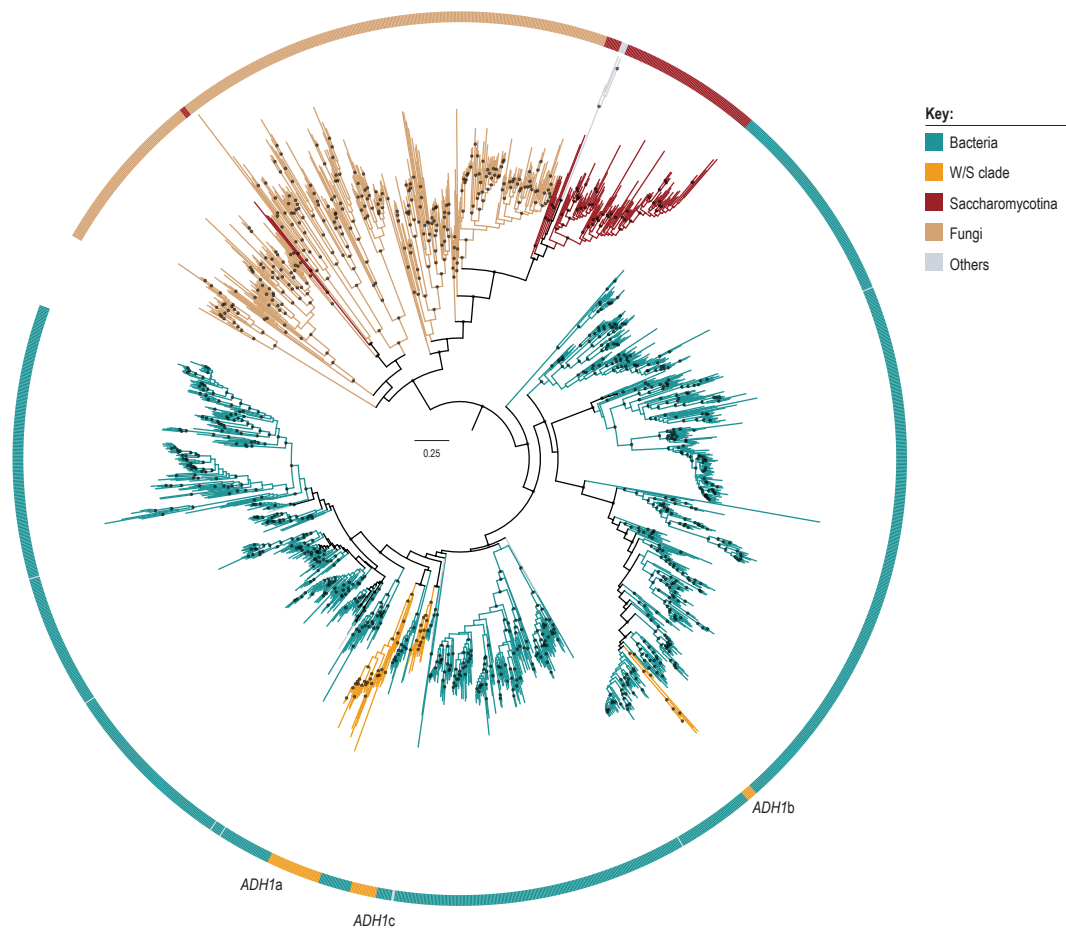

**B**

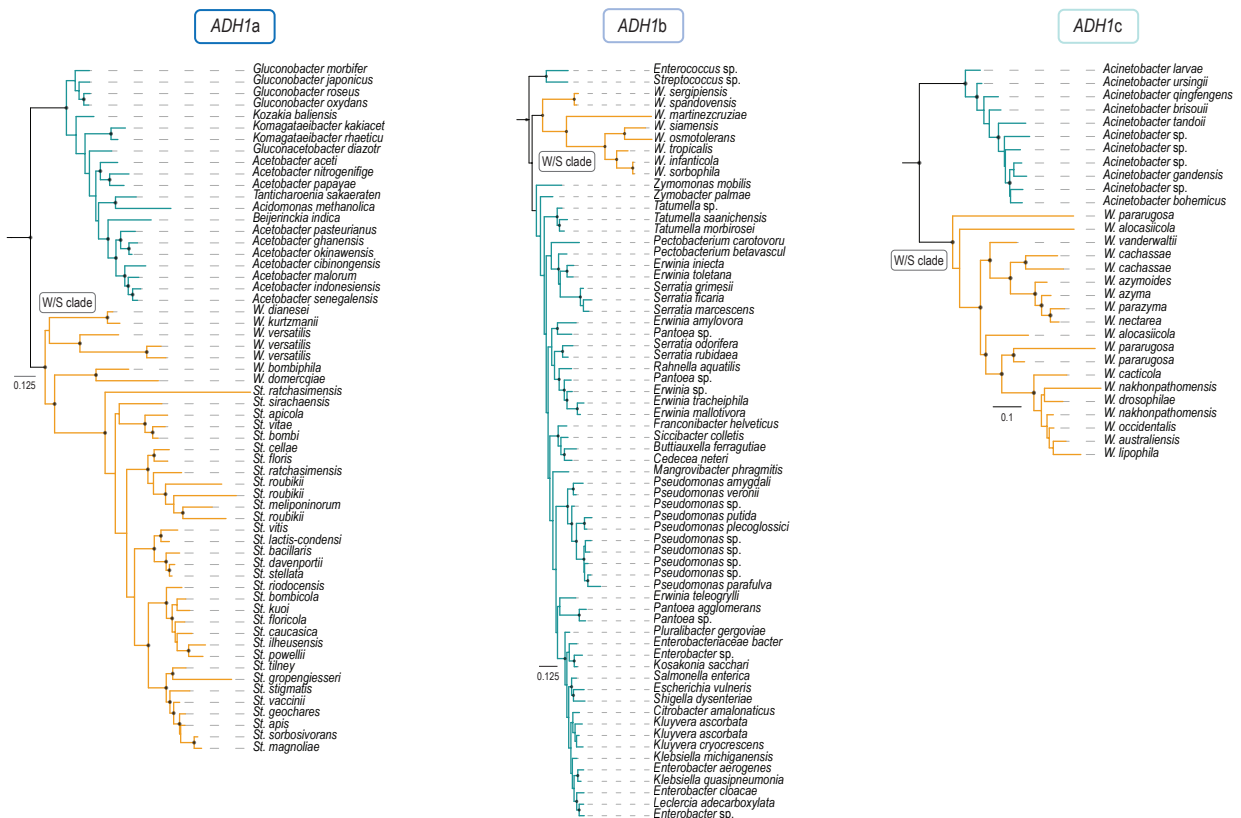

**Supplementary Figure S1. Fig. S1. Maximum-likelihood phylogeny of Adh1 proteins.** (A) The different lineages are represented by different branch colors (red for Saccharomycotina, light brown for other Fungi (i.e., non-Saccharomycotina), orange for the W/S clade and blue for bacteria). Poorly represented lineages (< 10 sequences) are shown in grey. Branches with bootstrap support higher than 95% are indicated by black dots. (B) Pruned maximum-likelihood phylogenies of Adh1 proteins depicting the phylogenetic relationship between the W/S clade and closest related species.
