# Supplementary material for: Extensive remodeling of sugar metabolism through gene loss and horizontal gene transfer in a eukaryotic lineage
Source: PubMed Central journal article supplement (PMC11140947; doi:10.1186/s12915-024-01929-7), 2024-05-30
Supplement: 12915_2024_1929_MOESM5_ESM.pdf [file 12915_2024_1929_MOESM5_ESM.pdf]

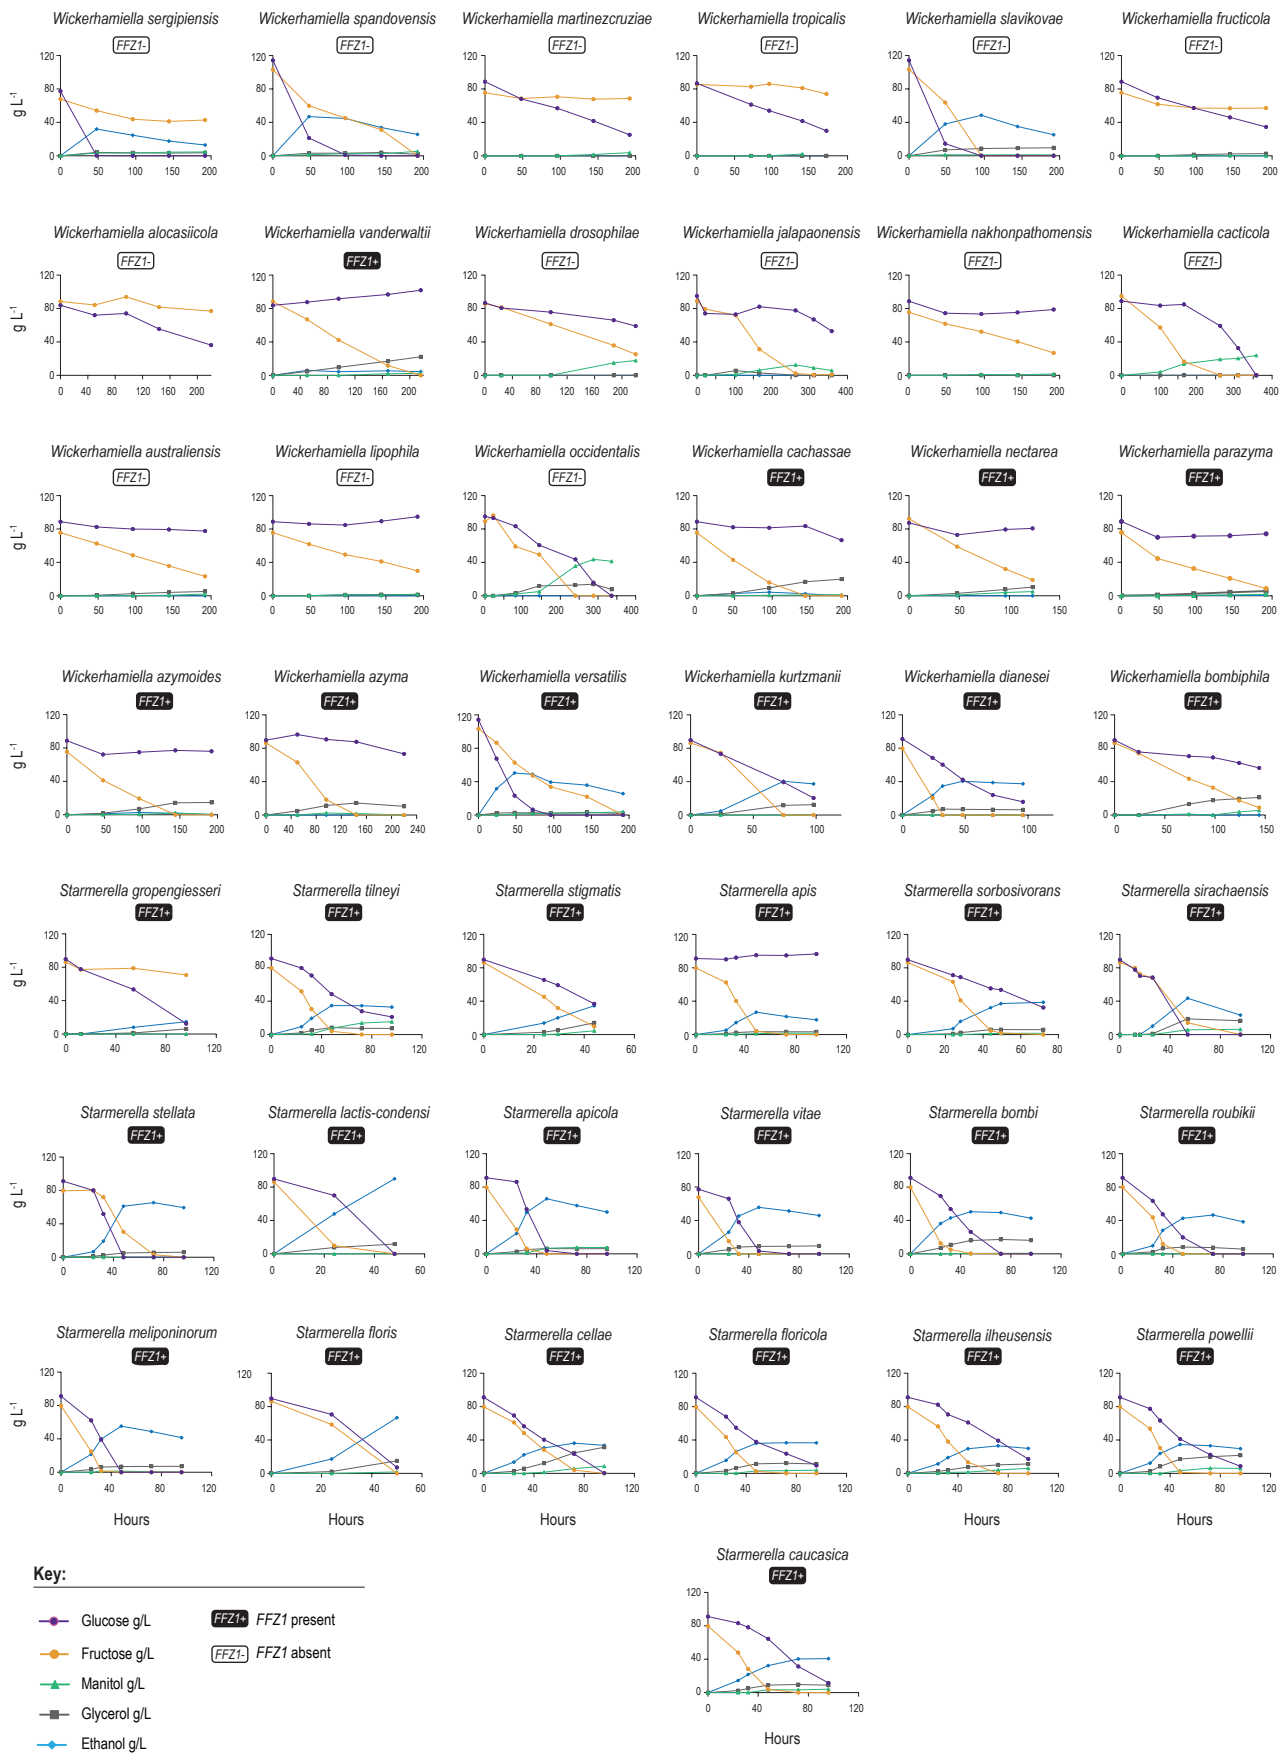

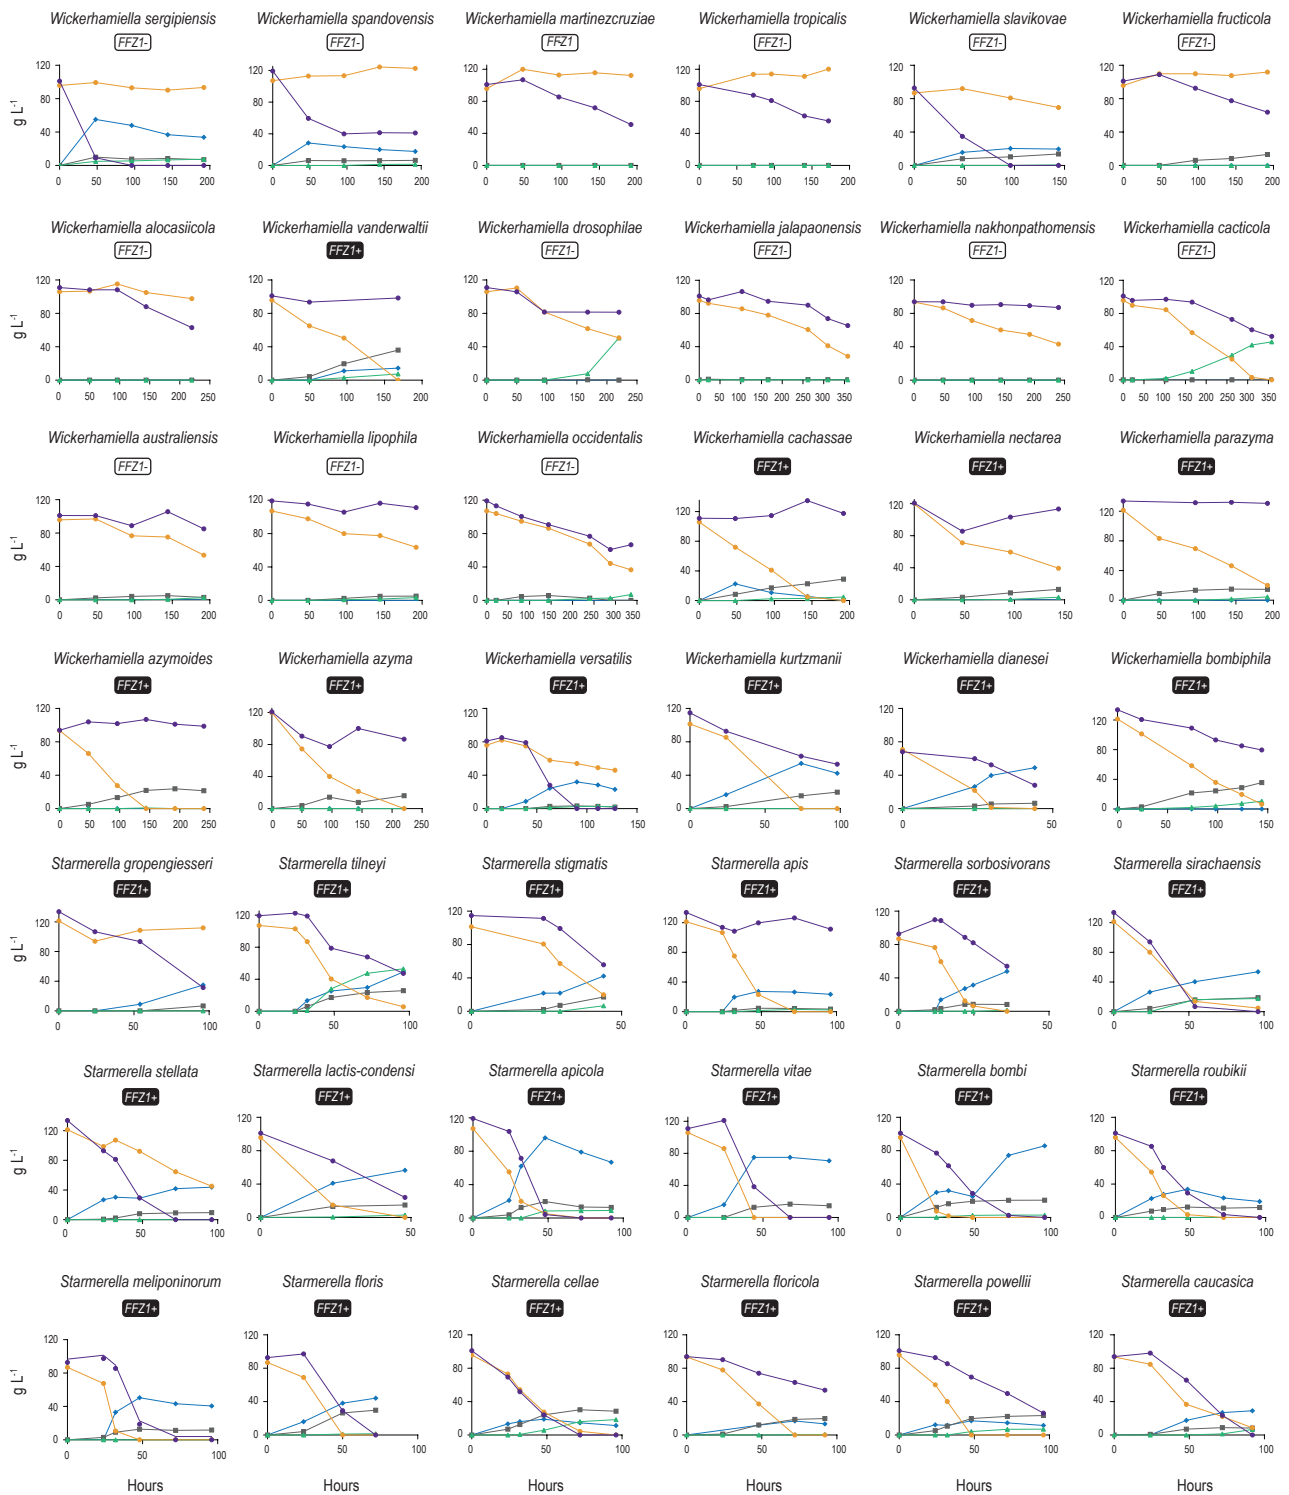

**Key:**

- Glucose g/L
- Fructose g/L
- ▲ Manitol g/L
- Glycerol g/L
- ◆ Ethanol g/L
- FFZ1+ FFZ1 present
- FFZ1- FFZ1 absent

**Supplementary Figure S4. Consumption profiles across the W/S clade.** Quantification of sugar consumption and fermentative products production across 42 species grown in YP medium supplemented with 100 g/L glucose and 100 g/L fructose. Results of two independent experiments for each species are shown.
