# Supplementary material for: Extensive remodeling of sugar metabolism through gene loss and horizontal gene transfer in a eukaryotic lineage
Source: PubMed Central journal article supplement (PMC11140947; doi:10.1186/s12915-024-01929-7), 2024-05-30
Supplement: 12915_2024_1929_MOESM7_ESM.pdf [file 12915_2024_1929_MOESM7_ESM.pdf]

**A**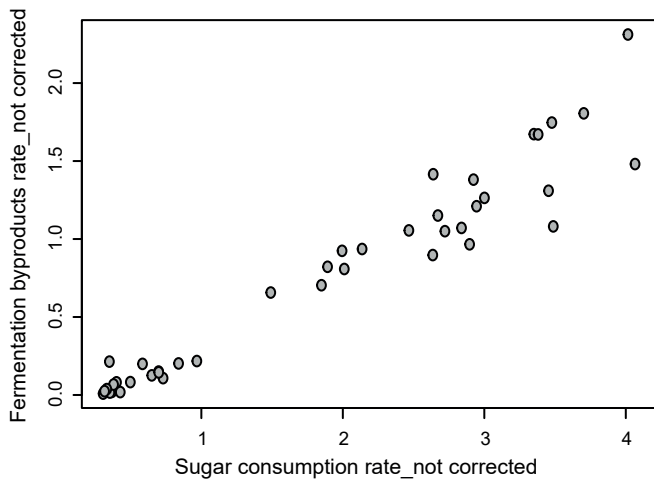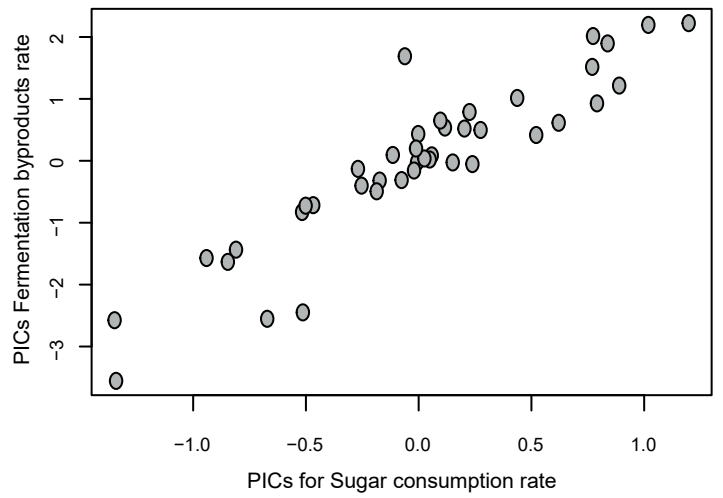**B**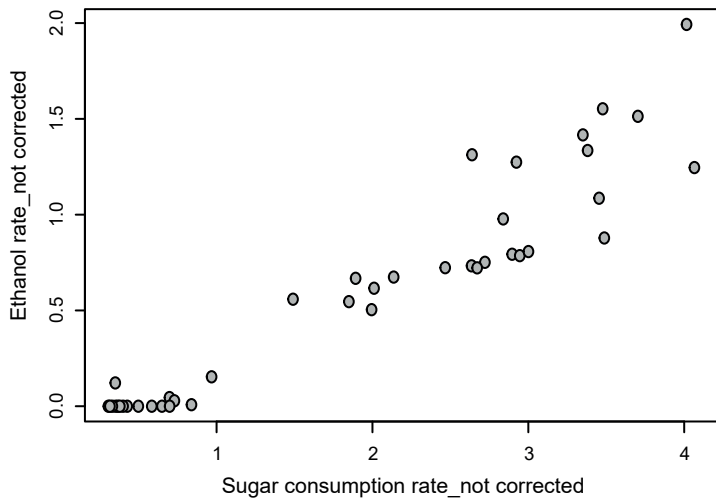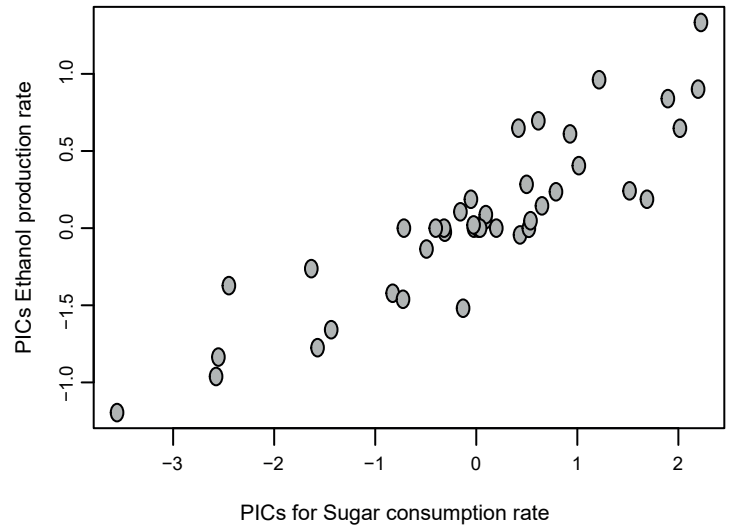

**Supplementary Figure S5. Phylogenetic correction of the correlation between sugar consumption rates and fermentation byproducts production rates across the W/S clade.** On the left, original values for sugar consumption rates and fermentation byproducts rates (A) or ethanol production rates (B) are shown. On the right, respective PIC (phylogenetic independent contrasts) corrected values are represented.
