# Supplementary material for: Extensive remodeling of sugar metabolism through gene loss and horizontal gene transfer in a eukaryotic lineage
Source: PubMed Central journal article supplement (PMC11140947; doi:10.1186/s12915-024-01929-7), 2024-05-30
Supplement: 12915_2024_1929_MOESM9_ESM.pdf [file 12915_2024_1929_MOESM9_ESM.pdf]

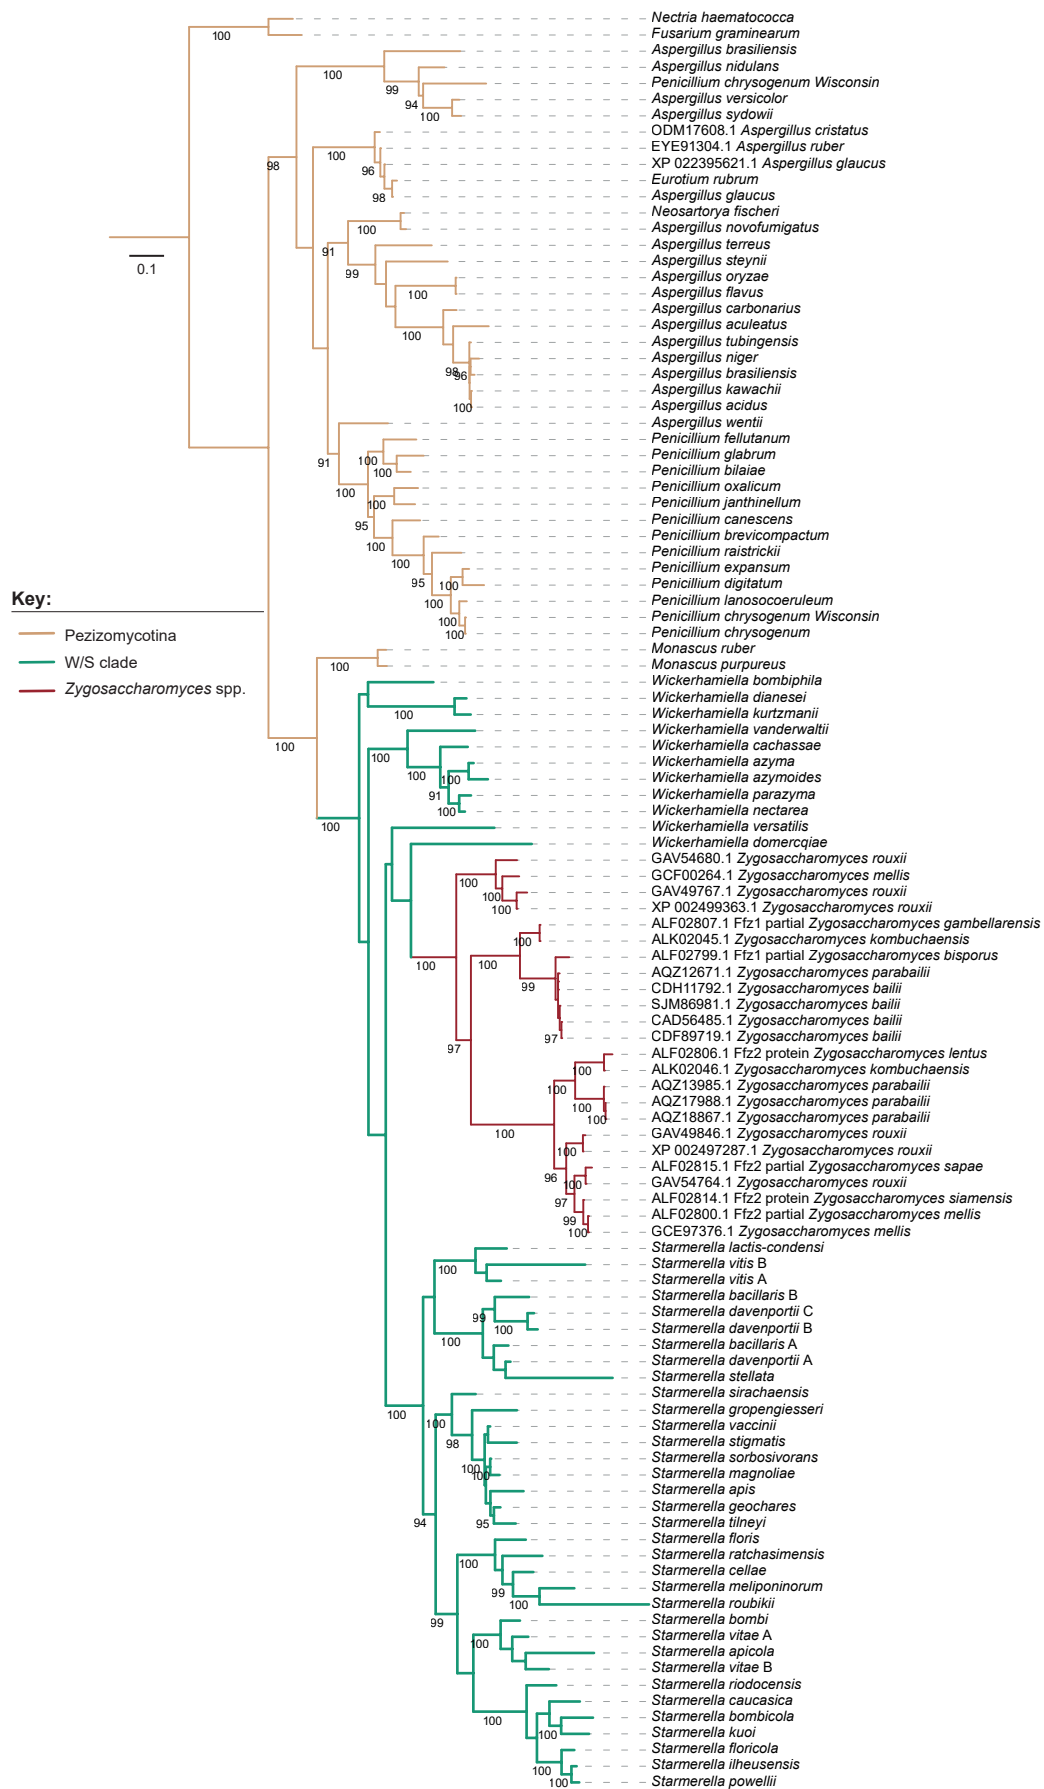

**Supplementary Figure S7. Maximum-likelihood phylogeny of the Ffz1 transporter.** Phylogeny depicting the relationships between W/S clade Ffz1 proteins and their closest relatives. The different lineages are represented by different branch colors (red for *Zygosaccharomyces* spp., light orange for other Pezizomycotina and blue for W/S clade) as indicated in the key. Bootstrap support values are indicated below the respective branch.
